# Supplementary material
Source: MDPI journal article supplement (https://www.mdpi.com/2072-4292/15/12/3105)
Supplement: s1 [file s1]

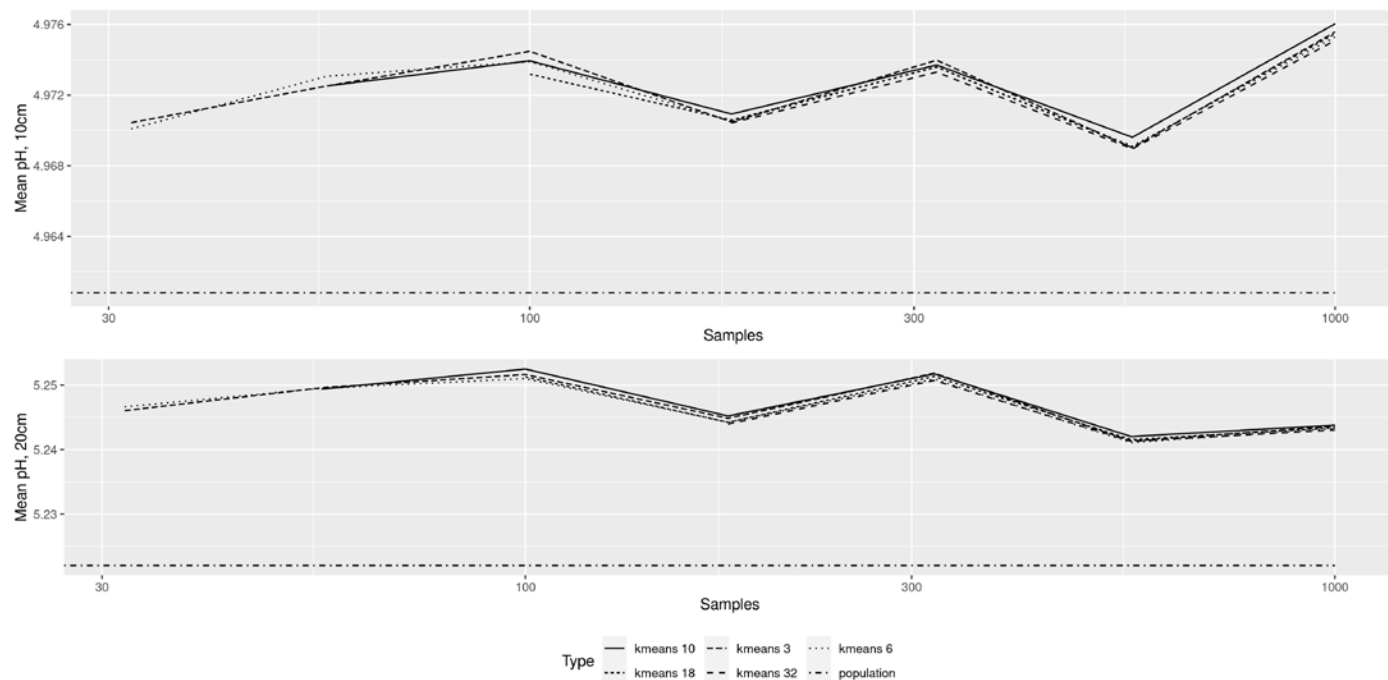

**Figure S1.** Global mean pH estimated by sample mean in simulated sampling experiments, compared with population value estimated from CAF model.

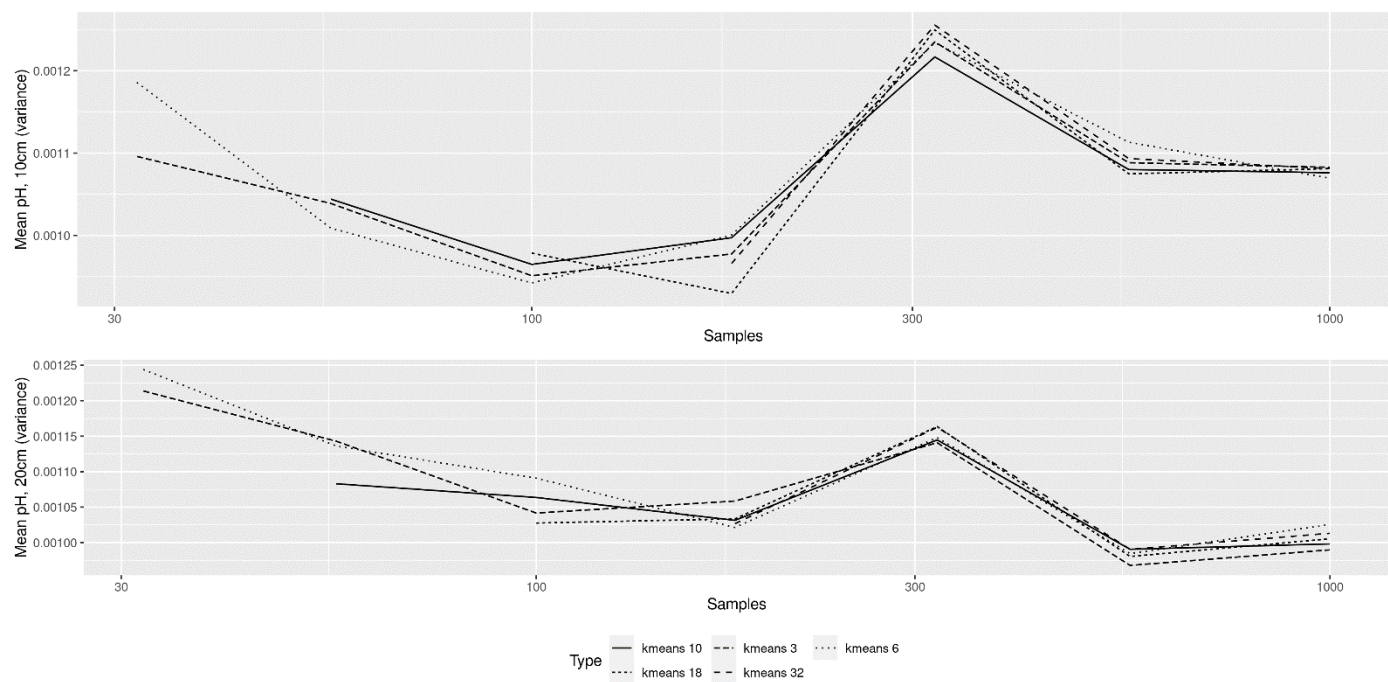

**Figure S2.** Sample variance of global mean in simulated sampling experiments.

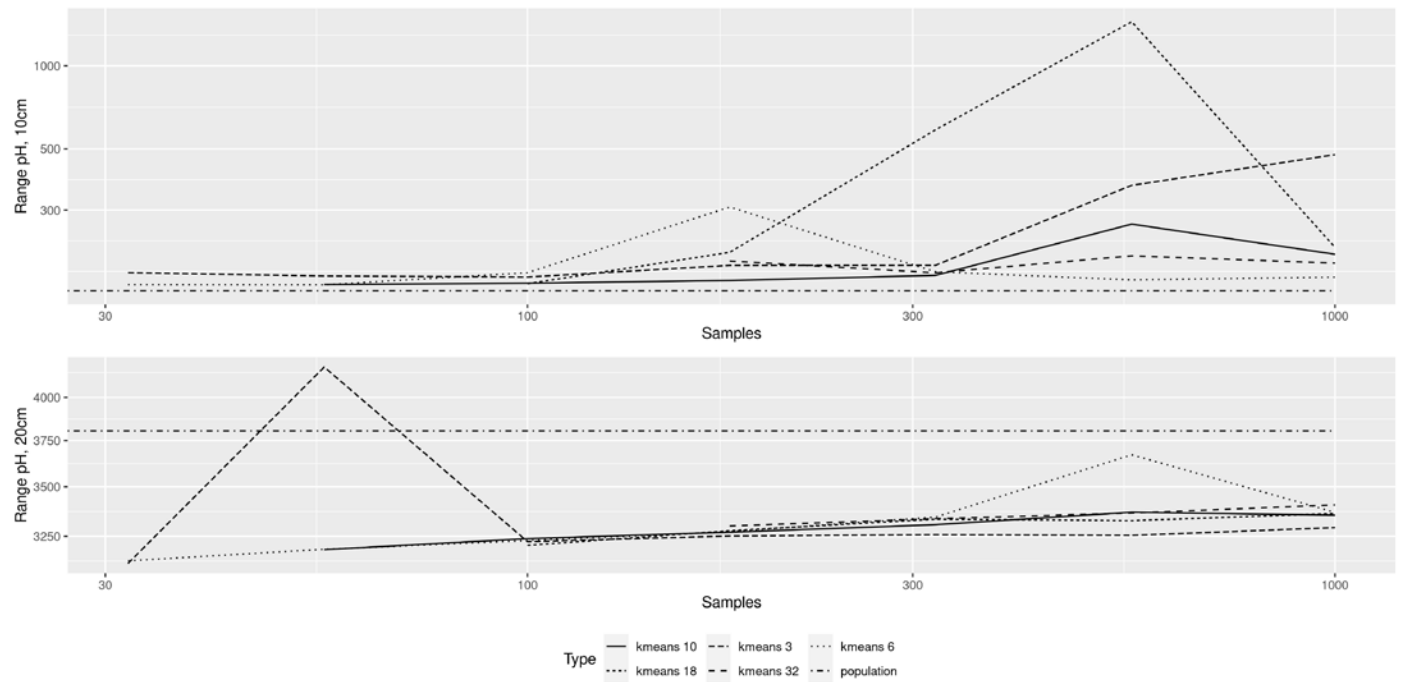

**Figure S3.** Semivariogram range estimated by sample mean in simulated sampling experiments, compared with population value estimated from CAF model.

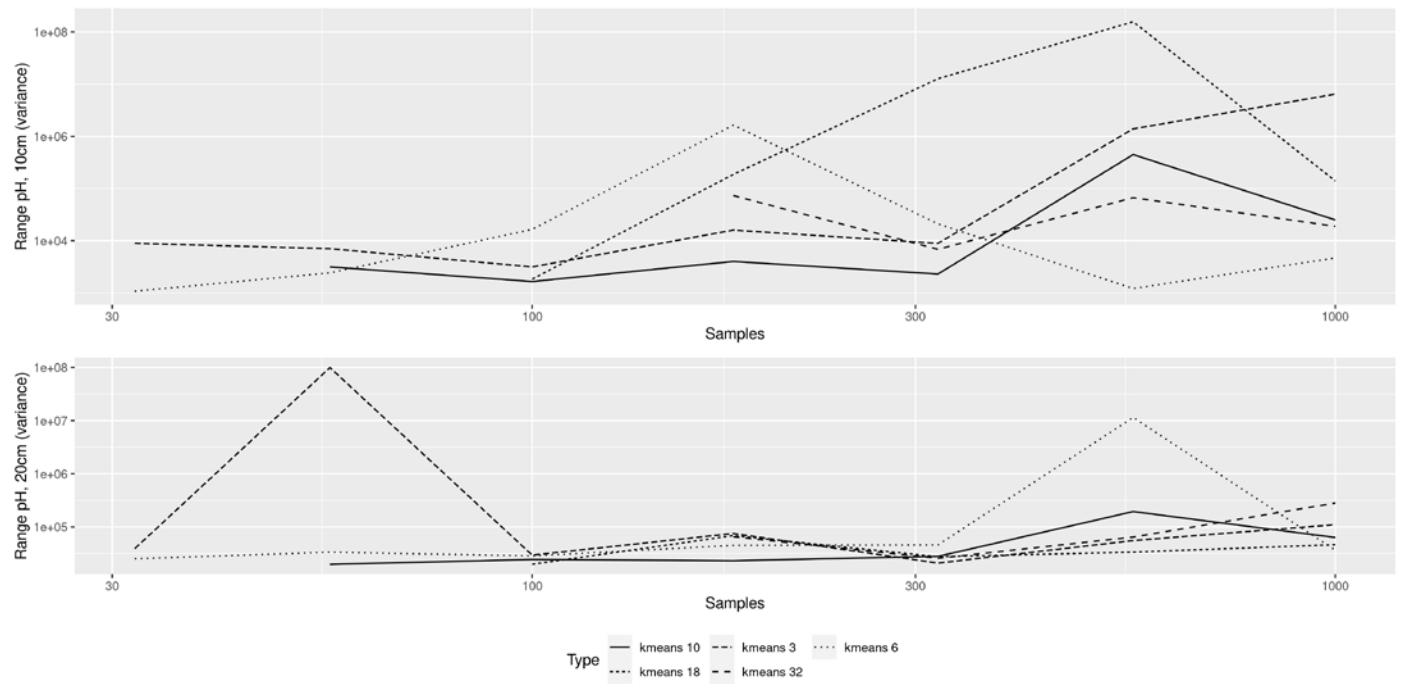

**Figure S4.** Sample variance of semivariogram range in simulated sampling experiments.
